# Supplementary material for: Morphology effect of one-dimensional iron oxide nanocatalysts on Fischer–Tropsch synthesis
Source: Royal Society of Chemistry journal article supplement (doi:10.1039/c6cy01258b), 2016-01-01
Supplement: c6cy01258b1.pdf [file c6cy01258b1.pdf]

## Supporting Materials

### Morphology effect of one-dimensional iron oxide nanocatalysts on Fischer-Tropsch synthesis

Jiaqiang Sun,<sup>a\*</sup> Yilong Chen,<sup>b</sup> and Jiangang Chen<sup>a\*</sup>

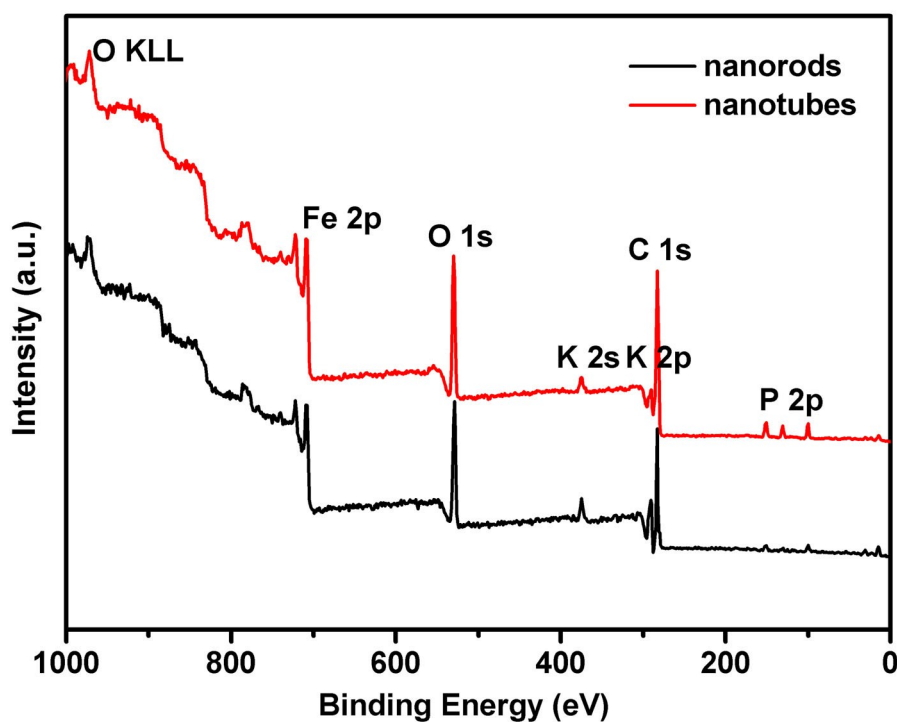

Fig. S1 XPS survey spectra of the 1D Fe<sub>2</sub>O<sub>3</sub> nanocatalysts.

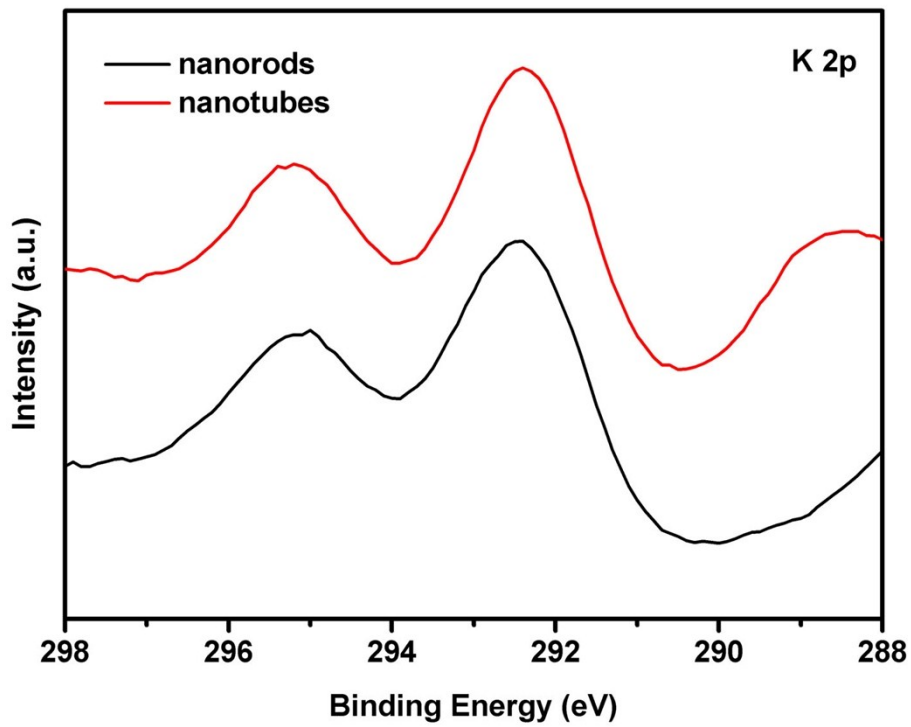

Fig. S2 K 2p XPS spectra of the 1D Fe<sub>2</sub>O<sub>3</sub> nanocatalysts.

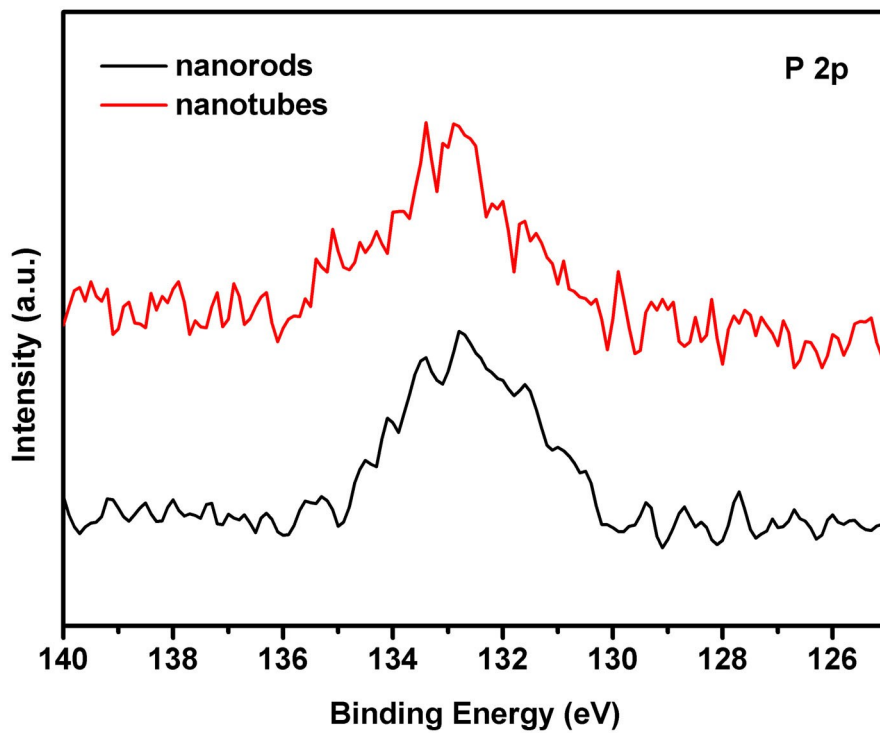

Fig. S3 P 2p XPS spectra of the 1D Fe<sub>2</sub>O<sub>3</sub> nanocatalysts.

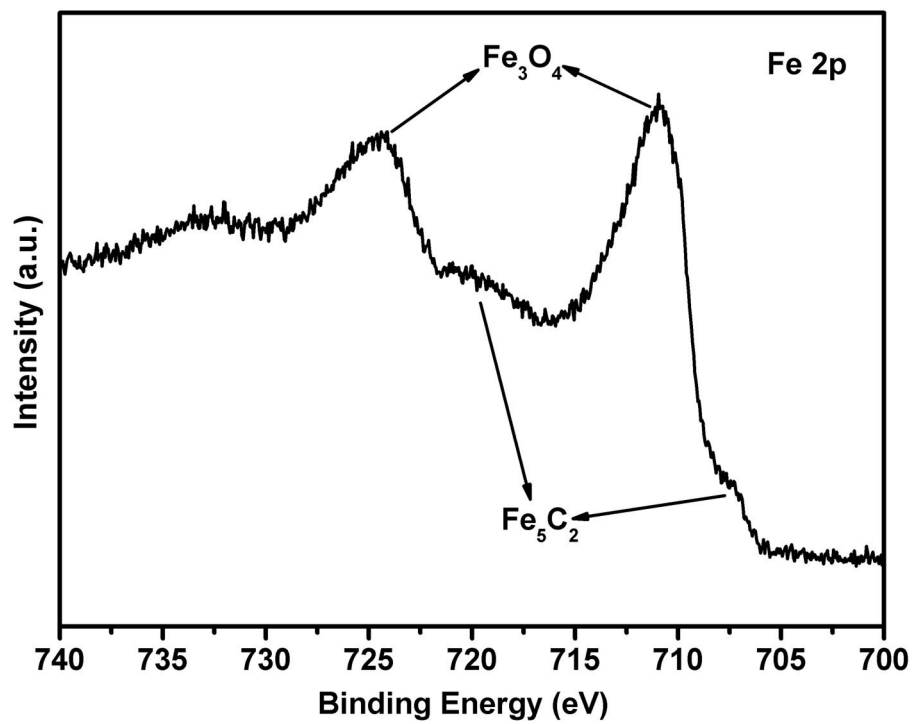

Fig. S4 Fe 2p XPS spectra of the used nanotube catalysts.
